# Supplementary material for: Enhancing the Functional Content of Eukaryotic Protein Interaction Networks
Source: PubMed Central journal article supplement (PMC4183583; doi:10.1371/journal.pone.0109130), 2014-10-02
Supplement: pone.0109130.s006.pdf [file pone.0109130.s006.pdf]

| <b>GO Term ID</b> | <b>Definition</b>                                                    | <b>Size</b> |
|-------------------|----------------------------------------------------------------------|-------------|
| GO:0045944        | positive regulation of transcription from RNA polymerase II promoter | 329         |
| GO:0008284        | positive regulation of cell proliferation                            | 225         |
| GO:0000122        | negative regulation of transcription from RNA polymerase II promoter | 212         |
| GO:0043066        | negative regulation of apoptotic process                             | 212         |
| GO:0008285        | negative regulation of cell proliferation                            | 183         |
| GO:0016482        | cytoplasmic transport                                                | 179         |
| GO:1901701        | cellular response to oxygen-containing compound                      | 168         |
| GO:0045597        | positive regulation of cell differentiation                          | 158         |
| GO:0043065        | positive regulation of apoptotic process                             | 136         |
| GO:0048468        | cell development                                                     | 127         |
| GO:0030335        | positive regulation of cell migration                                | 125         |
| GO:0045596        | negative regulation of cell differentiation                          | 125         |
| GO:0010638        | positive regulation of organelle organization                        | 118         |
| GO:0016044        | cellular membrane organization                                       | 113         |
| GO:0000398        | mRNA splicing, via spliceosome                                       | 110         |
| GO:0000226        | microtubule cytoskeleton organization                                | 106         |
| GO:0071363        | cellular response to growth factor stimulus                          | 105         |
| GO:0007169        | transmembrane receptor protein tyrosine kinase signaling pathway     | 102         |
| GO:0043123        | positive regulation of I-kappaB kinase/NF-kappaB cascade             | 102         |
| GO:0046777        | protein autophosphorylation                                          | 101         |
| GO:1901566        | organonitrogen compound biosynthetic process                         | 100         |
| GO:0055114        | oxidation-reduction process                                          | 97          |
| GO:0000209        | protein polyubiquitination                                           | 96          |
| GO:0051259        | protein oligomerization                                              | 94          |
| GO:0007005        | mitochondrion organization                                           | 92          |
| GO:0009887        | organ morphogenesis                                                  | 91          |
| GO:0045786        | negative regulation of cell cycle                                    | 90          |
| GO:0050678        | regulation of epithelial cell proliferation                          | 90          |
| GO:0051098        | regulation of binding                                                | 89          |
| GO:0001819        | positive regulation of cytokine production                           | 87          |
| GO:0009154        | purine ribonucleotide catabolic process                              | 87          |
| GO:0070925        | organelle assembly                                                   | 87          |
| GO:1901137        | carbohydrate derivative biosynthetic process                         | 87          |
| GO:0006366        | transcription from RNA polymerase II promoter                        | 86          |
| GO:0010639        | negative regulation of organelle organization                        | 86          |
| GO:0000902        | cell morphogenesis                                                   | 84          |
| GO:0006469        | negative regulation of protein kinase activity                       | 84          |
| GO:0071214        | cellular response to abiotic stimulus                                | 84          |
| GO:0009611        | response to wounding                                                 | 83          |
| GO:0030036        | actin cytoskeleton organization                                      | 83          |
| GO:0043161        | proteasomal ubiquitin-dependent protein catabolic process            | 83          |
| GO:0046130        | purine ribonucleoside catabolic process                              | 83          |
| GO:0006605        | protein targeting                                                    | 82          |
| GO:0019216        | regulation of lipid metabolic process                                | 82          |
| GO:0043623        | cellular protein complex assembly                                    | 82          |
| GO:0044057        | regulation of system process                                         | 81          |
| GO:0007059        | chromosome segregation                                               | 80          |
| GO:0008610        | lipid biosynthetic process                                           | 80          |
| GO:0009615        | response to virus                                                    | 79          |
| GO:0022613        | ribonucleoprotein complex biogenesis                                 | 79          |

|            |                                                                                        |    |
|------------|----------------------------------------------------------------------------------------|----|
| GO:0030030 | cell projection organization                                                           | 79 |
| GO:0030097 | hemopoiesis                                                                            | 79 |
| GO:2001020 | regulation of response to DNA damage stimulus                                          | 79 |
| GO:0001666 | response to hypoxia                                                                    | 78 |
| GO:0006520 | cellular amino acid metabolic process                                                  | 78 |
| GO:0006897 | endocytosis                                                                            | 78 |
| GO:0016197 | endosomal transport                                                                    | 78 |
| GO:0009207 | purine ribonucleoside triphosphate catabolic process                                   | 76 |
| GO:0043433 | negative regulation of sequence-specific DNA binding transcription factor activity     | 76 |
| GO:0071496 | cellular response to external stimulus                                                 | 76 |
| GO:0006417 | regulation of translation                                                              | 75 |
| GO:0010741 | negative regulation of intracellular protein kinase cascade                            | 75 |
| GO:0045765 | regulation of angiogenesis                                                             | 75 |
| GO:0071417 | cellular response to organonitrogen compound                                           | 75 |
| GO:0007507 | heart development                                                                      | 74 |
| GO:0008283 | cell proliferation                                                                     | 74 |
| GO:0031331 | positive regulation of cellular catabolic process                                      | 74 |
| GO:0031396 | regulation of protein ubiquitination                                                   | 74 |
| GO:0045637 | regulation of myeloid cell differentiation                                             | 74 |
| GO:0007186 | G-protein coupled receptor signaling pathway                                           | 73 |
| GO:0033044 | regulation of chromosome organization                                                  | 73 |
| GO:0060828 | regulation of canonical Wnt receptor signaling pathway                                 | 73 |
| GO:0006412 | translation                                                                            | 72 |
| GO:0006913 | nucleocytoplasmic transport                                                            | 72 |
| GO:0031344 | regulation of cell projection organization                                             | 72 |
| GO:0071396 | cellular response to lipid                                                             | 72 |
| GO:0090068 | positive regulation of cell cycle process                                              | 72 |
| GO:0032870 | cellular response to hormone stimulus                                                  | 71 |
| GO:0060627 | regulation of vesicle-mediated transport                                               | 71 |
| GO:0032147 | activation of protein kinase activity                                                  | 70 |
| GO:0050877 | neurological system process                                                            | 70 |
| GO:0044723 | single-organism carbohydrate metabolic process                                         | 69 |
| GO:0016573 | histone acetylation                                                                    | 68 |
| GO:0022414 | reproductive process                                                                   | 68 |
| GO:0032956 | regulation of actin cytoskeleton organization                                          | 68 |
| GO:0044283 | small molecule biosynthetic process                                                    | 68 |
| GO:2001234 | negative regulation of apoptotic signaling pathway                                     | 68 |
| GO:0030336 | negative regulation of cell migration                                                  | 67 |
| GO:0034470 | ncRNA processing                                                                       | 67 |
| GO:0050731 | positive regulation of peptidyl-tyrosine phosphorylation                               | 67 |
| GO:0016337 | cell-cell adhesion                                                                     | 66 |
| GO:0031647 | regulation of protein stability                                                        | 66 |
| GO:0032103 | positive regulation of response to external stimulus                                   | 66 |
| GO:0042306 | regulation of protein import into nucleus                                              | 66 |
| GO:0046328 | regulation of JNK cascade                                                              | 66 |
| GO:0006874 | cellular calcium ion homeostasis                                                       | 65 |
| GO:0030308 | negative regulation of cell growth                                                     | 65 |
| GO:0071407 | cellular response to organic cyclic compound                                           | 65 |
| GO:0071705 | nitrogen compound transport                                                            | 65 |
| GO:0090092 | regulation of transmembrane receptor protein serine/threonine kinase signaling pathway | 65 |

|            |                                                                                           |    |
|------------|-------------------------------------------------------------------------------------------|----|
| GO:0002697 | regulation of immune effector process                                                     | 64 |
| GO:0006302 | double-strand break repair                                                                | 64 |
| GO:0034765 | regulation of ion transmembrane transport                                                 | 64 |
| GO:0051092 | positive regulation of NF-kappaB transcription factor activity                            | 64 |
| GO:2001236 | regulation of extrinsic apoptotic signaling pathway                                       | 64 |
| GO:0030855 | epithelial cell differentiation                                                           | 63 |
| GO:0007067 | mitosis                                                                                   | 62 |
| GO:0051047 | positive regulation of secretion                                                          | 62 |
| GO:2000021 | regulation of ion homeostasis                                                             | 62 |
| GO:0006631 | fatty acid metabolic process                                                              | 61 |
| GO:0043280 | positive regulation of cysteine-type endopeptidase activity involved in apoptotic process | 61 |
| GO:0043414 | macromolecule methylation                                                                 | 60 |
| GO:0044403 | symbiosis, encompassing mutualism through parasitism                                      | 60 |
| GO:0045787 | positive regulation of cell cycle                                                         | 60 |
| GO:0010921 | regulation of phosphatase activity                                                        | 59 |
| GO:0016579 | protein deubiquitination                                                                  | 59 |
| GO:0042493 | response to drug                                                                          | 59 |
| GO:0061061 | muscle structure development                                                              | 59 |
| GO:0008015 | blood circulation                                                                         | 58 |
| GO:0010769 | regulation of cell morphogenesis involved in differentiation                              | 58 |
| GO:0044282 | small molecule catabolic process                                                          | 58 |
| GO:0051251 | positive regulation of lymphocyte activation                                              | 58 |
| GO:0097193 | intrinsic apoptotic signaling pathway                                                     | 58 |
| GO:1901991 | negative regulation of mitotic cell cycle phase transition                                | 58 |
| GO:0000077 | DNA damage checkpoint                                                                     | 57 |
| GO:0009411 | response to UV                                                                            | 57 |
| GO:0032886 | regulation of microtubule-based process                                                   | 57 |
| GO:0042391 | regulation of membrane potential                                                          | 57 |
| GO:0043406 | positive regulation of MAP kinase activity                                                | 57 |
| GO:0045321 | leukocyte activation                                                                      | 57 |
| GO:0045664 | regulation of neuron differentiation                                                      | 57 |
| GO:0050792 | regulation of viral process                                                               | 57 |
| GO:0051924 | regulation of calcium ion transport                                                       | 57 |
| GO:0001818 | negative regulation of cytokine production                                                | 56 |
| GO:0010038 | response to metal ion                                                                     | 56 |
| GO:0010594 | regulation of endothelial cell migration                                                  | 56 |
| GO:0019221 | cytokine-mediated signaling pathway                                                       | 56 |
| GO:0022403 | cell cycle phase                                                                          | 56 |
| GO:0034599 | cellular response to oxidative stress                                                     | 56 |
| GO:0035023 | regulation of Rho protein signal transduction                                             | 56 |
| GO:0050863 | regulation of T cell activation                                                           | 56 |
| GO:0071103 | DNA conformation change                                                                   | 56 |
| GO:0090287 | regulation of cellular response to growth factor stimulus                                 | 56 |
| GO:0000910 | cytokinesis                                                                               | 55 |
| GO:0002683 | negative regulation of immune system process                                              | 55 |
| GO:0006470 | protein dephosphorylation                                                                 | 55 |
| GO:0007267 | cell-cell signaling                                                                       | 55 |
| GO:0010212 | response to ionizing radiation                                                            | 55 |
| GO:0022411 | cellular component disassembly                                                            | 55 |
| GO:0032409 | regulation of transporter activity                                                        | 55 |
| GO:0034220 | ion transmembrane transport                                                               | 55 |

|            |                                                                          |    |
|------------|--------------------------------------------------------------------------|----|
| GO:0048729 | tissue morphogenesis                                                     | 55 |
| GO:0050920 | regulation of chemotaxis                                                 | 55 |
| GO:0060326 | cell chemotaxis                                                          | 55 |
| GO:2001242 | regulation of intrinsic apoptotic signaling pathway                      | 55 |
| GO:0006275 | regulation of DNA replication                                            | 54 |
| GO:0010951 | negative regulation of endopeptidase activity                            | 54 |
| GO:0030278 | regulation of ossification                                               | 54 |
| GO:0045785 | positive regulation of cell adhesion                                     | 54 |
| GO:0000165 | MAPK cascade                                                             | 53 |
| GO:0002253 | activation of immune response                                            | 53 |
| GO:0006820 | anion transport                                                          | 53 |
| GO:0007417 | central nervous system development                                       | 53 |
| GO:0009790 | embryo development                                                       | 53 |
| GO:0030178 | negative regulation of Wnt receptor signaling pathway                    | 53 |
| GO:0050708 | regulation of protein secretion                                          | 53 |
| GO:0051054 | positive regulation of DNA metabolic process                             | 53 |
| GO:0051224 | negative regulation of protein transport                                 | 53 |
| GO:0051640 | organelle localization                                                   | 53 |
| GO:0090066 | regulation of anatomical structure size                                  | 53 |
| GO:0090316 | positive regulation of intracellular protein transport                   | 53 |
| GO:0002252 | immune effector process                                                  | 52 |
| GO:0006066 | alcohol metabolic process                                                | 52 |
| GO:0018209 | peptidyl-serine modification                                             | 52 |
| GO:0032320 | positive regulation of Ras GTPase activity                               | 52 |
| GO:0032496 | response to lipopolysaccharide                                           | 52 |
| GO:0045732 | positive regulation of protein catabolic process                         | 52 |
| GO:0045862 | positive regulation of proteolysis                                       | 52 |
| GO:0046034 | ATP metabolic process                                                    | 52 |
| GO:0046903 | secretion                                                                | 52 |
| GO:0051186 | cofactor metabolic process                                               | 52 |
| GO:0070838 | divalent metal ion transport                                             | 52 |
| GO:0007178 | transmembrane receptor protein serine/threonine kinase signaling pathway | 51 |
| GO:0009165 | nucleotide biosynthetic process                                          | 51 |
| GO:0031334 | positive regulation of protein complex assembly                          | 51 |
| GO:0045087 | innate immune response                                                   | 51 |
| GO:0097202 | activation of cysteine-type endopeptidase activity                       | 51 |
| GO:0001525 | angiogenesis                                                             | 50 |
| GO:0006402 | mRNA catabolic process                                                   | 50 |
| GO:0030182 | neuron differentiation                                                   | 50 |
| GO:0034504 | protein localization to nucleus                                          | 50 |
| GO:0040029 | regulation of gene expression, epigenetic                                | 50 |
| GO:0044772 | mitotic cell cycle phase transition                                      | 50 |
| GO:0045088 | regulation of innate immune response                                     | 50 |
| GO:0061136 | regulation of proteasomal protein catabolic process                      | 50 |
| GO:0070374 | positive regulation of ERK1 and ERK2 cascade                             | 50 |
| GO:0097194 | execution phase of apoptosis                                             | 50 |

---
