# Supplementary material for: Enhancing the Functional Content of Eukaryotic Protein Interaction Networks
Source: PubMed Central journal article supplement (PMC4183583; doi:10.1371/journal.pone.0109130), 2014-10-02
Supplement: pone.0109130.s007.pdf [file pone.0109130.s007.pdf]

| <b>GO Term ID</b> | <b>Definition</b>                                                    | <b>Size</b> |
|-------------------|----------------------------------------------------------------------|-------------|
| GO:0007476        | imaginal disc-derived wing morphogenesis                             | 237         |
| GO:0007411        | axon guidance                                                        | 152         |
| GO:0046331        | lateral inhibition                                                   | 144         |
| GO:0006909        | phagocytosis                                                         | 142         |
| GO:0045944        | positive regulation of transcription from RNA polymerase II promoter | 137         |
| GO:0007163        | establishment or maintenance of cell polarity                        | 133         |
| GO:0000398        | mRNA splicing, via spliceosome                                       | 132         |
| GO:0006259        | DNA metabolic process                                                | 126         |
| GO:0008283        | cell proliferation                                                   | 120         |
| GO:0034645        | cellular macromolecule biosynthetic process                          | 120         |
| GO:0044087        | regulation of cellular component biogenesis                          | 117         |
| GO:0009968        | negative regulation of signal transduction                           | 115         |
| GO:0048813        | dendrite morphogenesis                                               | 113         |
| GO:0007067        | mitosis                                                              | 111         |
| GO:0042127        | regulation of cell proliferation                                     | 102         |
| GO:0009967        | positive regulation of signal transduction                           | 96          |
| GO:0010608        | posttranscriptional regulation of gene expression                    | 96          |
| GO:0007059        | chromosome segregation                                               | 95          |
| GO:0008340        | determination of adult lifespan                                      | 95          |
| GO:0048589        | developmental growth                                                 | 95          |
| GO:0006955        | immune response                                                      | 94          |
| GO:0007626        | locomotory behavior                                                  | 93          |
| GO:0070925        | organelle assembly                                                   | 93          |
| GO:0010927        | cellular component assembly involved in morphogenesis                | 92          |
| GO:0009953        | dorsal/ventral pattern formation                                     | 89          |
| GO:0007420        | brain development                                                    | 88          |
| GO:0002682        | regulation of immune system process                                  | 84          |
| GO:0007155        | cell adhesion                                                        | 84          |
| GO:0008360        | regulation of cell shape                                             | 84          |
| GO:0051656        | establishment of organelle localization                              | 84          |
| GO:0001751        | compound eye photoreceptor cell differentiation                      | 83          |
| GO:0007298        | border follicle cell migration                                       | 82          |
| GO:0007015        | actin filament organization                                          | 80          |
| GO:0042981        | regulation of apoptotic process                                      | 79          |
| GO:0034613        | cellular protein localization                                        | 78          |
| GO:0040029        | regulation of gene expression, epigenetic                            | 78          |
| GO:0051049        | regulation of transport                                              | 78          |
| GO:0060341        | regulation of cellular localization                                  | 77          |
| GO:0051705        | multi-organism behavior                                              | 76          |
| GO:0001709        | cell fate determination                                              | 75          |
| GO:0044281        | small molecule metabolic process                                     | 75          |
| GO:0048638        | regulation of developmental growth                                   | 75          |
| GO:0000022        | mitotic spindle elongation                                           | 73          |
| GO:0030534        | adult behavior                                                       | 73          |
| GO:0006403        | RNA localization                                                     | 72          |
| GO:0007519        | skeletal muscle tissue development                                   | 72          |
| GO:0045664        | regulation of neuron differentiation                                 | 72          |
| GO:0051298        | centrosome duplication                                               | 72          |
| GO:1901564        | organonitrogen compound metabolic process                            | 72          |
| GO:0000122        | negative regulation of transcription from RNA polymerase II promoter | 71          |

|            |                                                        |    |
|------------|--------------------------------------------------------|----|
| GO:0051130 | positive regulation of cellular component organization | 71 |
| GO:0000910 | cytokinesis                                            | 70 |
| GO:0002164 | larval development                                     | 70 |
| GO:0007167 | enzyme linked receptor protein signaling pathway       | 70 |
| GO:0007286 | spermatid development                                  | 70 |
| GO:0009416 | response to light stimulus                             | 70 |
| GO:0015031 | protein transport                                      | 70 |
| GO:0022416 | chaeta development                                     | 70 |
| GO:0032535 | regulation of cellular component size                  | 70 |
| GO:0050808 | synapse organization                                   | 70 |
| GO:0051129 | negative regulation of cellular component organization | 70 |
| GO:0031399 | regulation of protein modification process             | 69 |
| GO:0044265 | cellular macromolecule catabolic process               | 69 |
| GO:0007391 | dorsal closure                                         | 68 |
| GO:0010627 | regulation of intracellular protein kinase cascade     | 68 |
| GO:0060249 | anatomical structure homeostasis                       | 68 |
| GO:0060562 | epithelial tube morphogenesis                          | 68 |
| GO:0016570 | histone modification                                   | 67 |
| GO:0034654 | nucleobase-containing compound biosynthetic process    | 67 |
| GO:0042742 | defense response to bacterium                          | 67 |
| GO:0007447 | imaginal disc pattern formation                        | 66 |
| GO:0050790 | regulation of catalytic activity                       | 66 |
| GO:0007349 | cellularization                                        | 65 |
| GO:0019098 | reproductive behavior                                  | 65 |
| GO:0007304 | chorion-containing eggshell formation                  | 64 |
| GO:0051094 | positive regulation of developmental process           | 64 |
| GO:0007293 | germarium-derived egg chamber formation                | 63 |
| GO:0009266 | response to temperature stimulus                       | 63 |
| GO:0016458 | gene silencing                                         | 63 |
| GO:0035556 | intracellular signal transduction                      | 63 |
| GO:0007095 | mitotic G2 DNA damage checkpoint                       | 61 |
| GO:0007600 | sensory perception                                     | 61 |
| GO:0016482 | cytoplasmic transport                                  | 61 |
| GO:0042048 | olfactory behavior                                     | 61 |
| GO:0008038 | neuron recognition                                     | 60 |
| GO:0019220 | regulation of phosphate metabolic process              | 60 |
| GO:0051493 | regulation of cytoskeleton organization                | 60 |
| GO:0001736 | establishment of planar polarity                       | 59 |
| GO:0031344 | regulation of cell projection organization             | 59 |
| GO:0097305 | response to alcohol                                    | 59 |
| GO:0006468 | protein phosphorylation                                | 57 |
| GO:0007507 | heart development                                      | 57 |
| GO:0006508 | proteolysis                                            | 56 |
| GO:0007480 | imaginal disc-derived leg morphogenesis                | 56 |
| GO:0042461 | photoreceptor cell development                         | 56 |
| GO:0048747 | muscle fiber development                               | 56 |
| GO:0050807 | regulation of synapse organization                     | 56 |
| GO:0007613 | memory                                                 | 55 |
| GO:0008593 | regulation of Notch signaling pathway                  | 55 |
| GO:0043900 | regulation of multi-organism process                   | 55 |
| GO:0071310 | cellular response to organic substance                 | 55 |
| GO:0006461 | protein complex assembly                               | 54 |

|            |                                                       |    |
|------------|-------------------------------------------------------|----|
| GO:0007618 | mating                                                | 54 |
| GO:0017145 | stem cell division                                    | 54 |
| GO:0019827 | stem cell maintenance                                 | 54 |
| GO:0042335 | cuticle development                                   | 54 |
| GO:0072002 | Malpighian tubule development                         | 54 |
| GO:0006629 | lipid metabolic process                               | 53 |
| GO:0007143 | female meiosis                                        | 53 |
| GO:0007498 | mesoderm development                                  | 53 |
| GO:0035071 | salivary gland cell autophagic cell death             | 53 |
| GO:0043484 | regulation of RNA splicing                            | 53 |
| GO:0048608 | reproductive structure development                    | 53 |
| GO:0080135 | regulation of cellular response to stress             | 53 |
| GO:0016202 | regulation of striated muscle tissue development      | 52 |
| GO:0031329 | regulation of cellular catabolic process              | 52 |
| GO:0035152 | regulation of tube architecture, open tracheal system | 52 |
| GO:0044706 | multi-multicellular organism process                  | 52 |
| GO:2000027 | regulation of organ morphogenesis                     | 52 |
| GO:0007623 | circadian rhythm                                      | 51 |
| GO:0045137 | development of primary sexual characteristics         | 51 |
| GO:0048546 | digestive tract morphogenesis                         | 51 |
| GO:0050684 | regulation of mRNA processing                         | 51 |
| GO:0006915 | apoptotic process                                     | 50 |
| GO:0007314 | oocyte anterior/posterior axis specification          | 50 |
| GO:0008544 | epidermis development                                 | 50 |
| GO:0019725 | cellular homeostasis                                  | 50 |
| GO:0044093 | positive regulation of molecular function             | 50 |
| GO:0045926 | negative regulation of growth                         | 50 |
| GO:0045995 | regulation of embryonic development                   | 50 |
| GO:0051247 | positive regulation of protein metabolic process      | 50 |

---
