# Supplementary material for: Enhancing the Functional Content of Eukaryotic Protein Interaction Networks
Source: PubMed Central journal article supplement (PMC4183583; doi:10.1371/journal.pone.0109130), 2014-10-02
Supplement: pone.0109130.s008.pdf [file pone.0109130.s008.pdf]

| CNS Measure     | Human                    |                          | Fly                     |                         |
|-----------------|--------------------------|--------------------------|-------------------------|-------------------------|
|                 | FunctionalFlow           | Neighborhood             | FunctionalFlow          | Neighborhood            |
| <i>JC</i>       | $2.2060 \times 10^{-21}$ | $5.0304 \times 10^{-21}$ | $1.4415 \times 10^{-6}$ | 0.0039                  |
| <i>P</i>        | 0.0495                   | 0.9161                   | $3.3036 \times 10^{-5}$ | 0.0533                  |
| <i>FS.bin</i>   | 0.2039                   | $8.5403 \times 10^{-4}$  | 0.2186                  | 0.0378                  |
| <i>TOM.bin</i>  | $2.7304 \times 10^{-6}$  | 0.0018                   | 0.0078                  | 0.5420                  |
| <i>HC.bin</i>   | $7.6277 \times 10^{-20}$ | $7.9610 \times 10^{-15}$ | 0.0063                  | 0.2626                  |
| <i>FS.cont</i>  | 0.8972                   | 0.0102                   | 0.0115                  | $4.0388 \times 10^{-4}$ |
| <i>TOM.cont</i> | 0.5667                   | 0.1148                   | 0.3835                  | 0.0097                  |
| <i>HC.cont</i>  | $1.7239 \times 10^{-21}$ | $4.9478 \times 10^{-13}$ | 0.1786                  | 0.0054                  |
